# Supplementary material for: Credentialing and Pharmacologically Targeting PTP4A3 Phosphatase as a Molecular Target for Ovarian Cancer
Source: MDPI journal article supplement (doi:10.3390/biom11070969), 2021-06-30
Supplement: s1 [file s1]

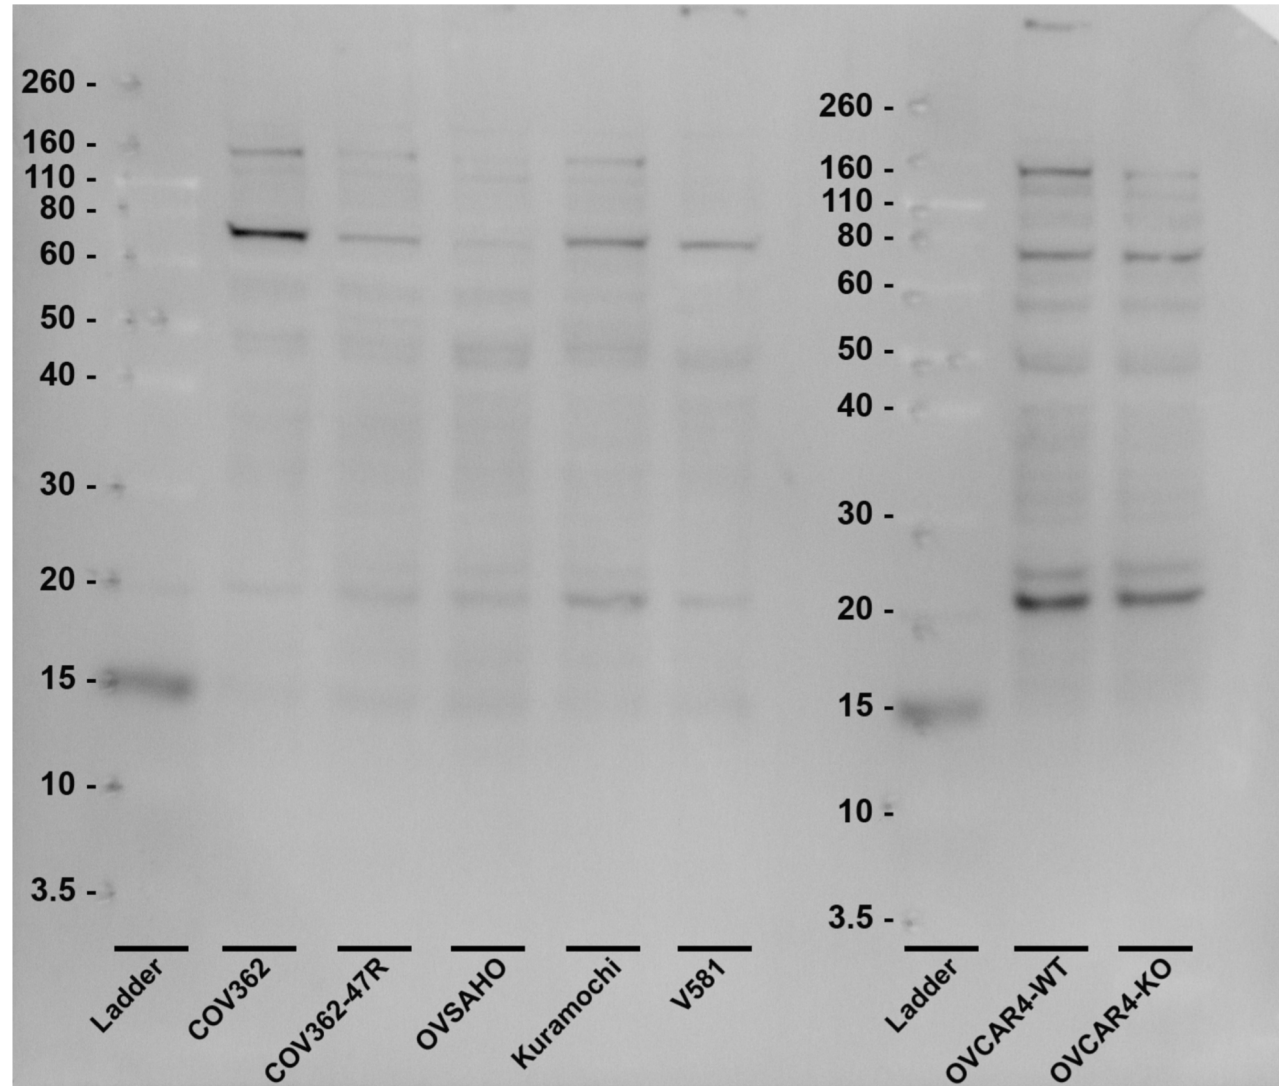

**Supplemental Figure S1.** Full western blot for PTP4A3 with the Novus antibody. Molecular weight markers are indicated on the left.

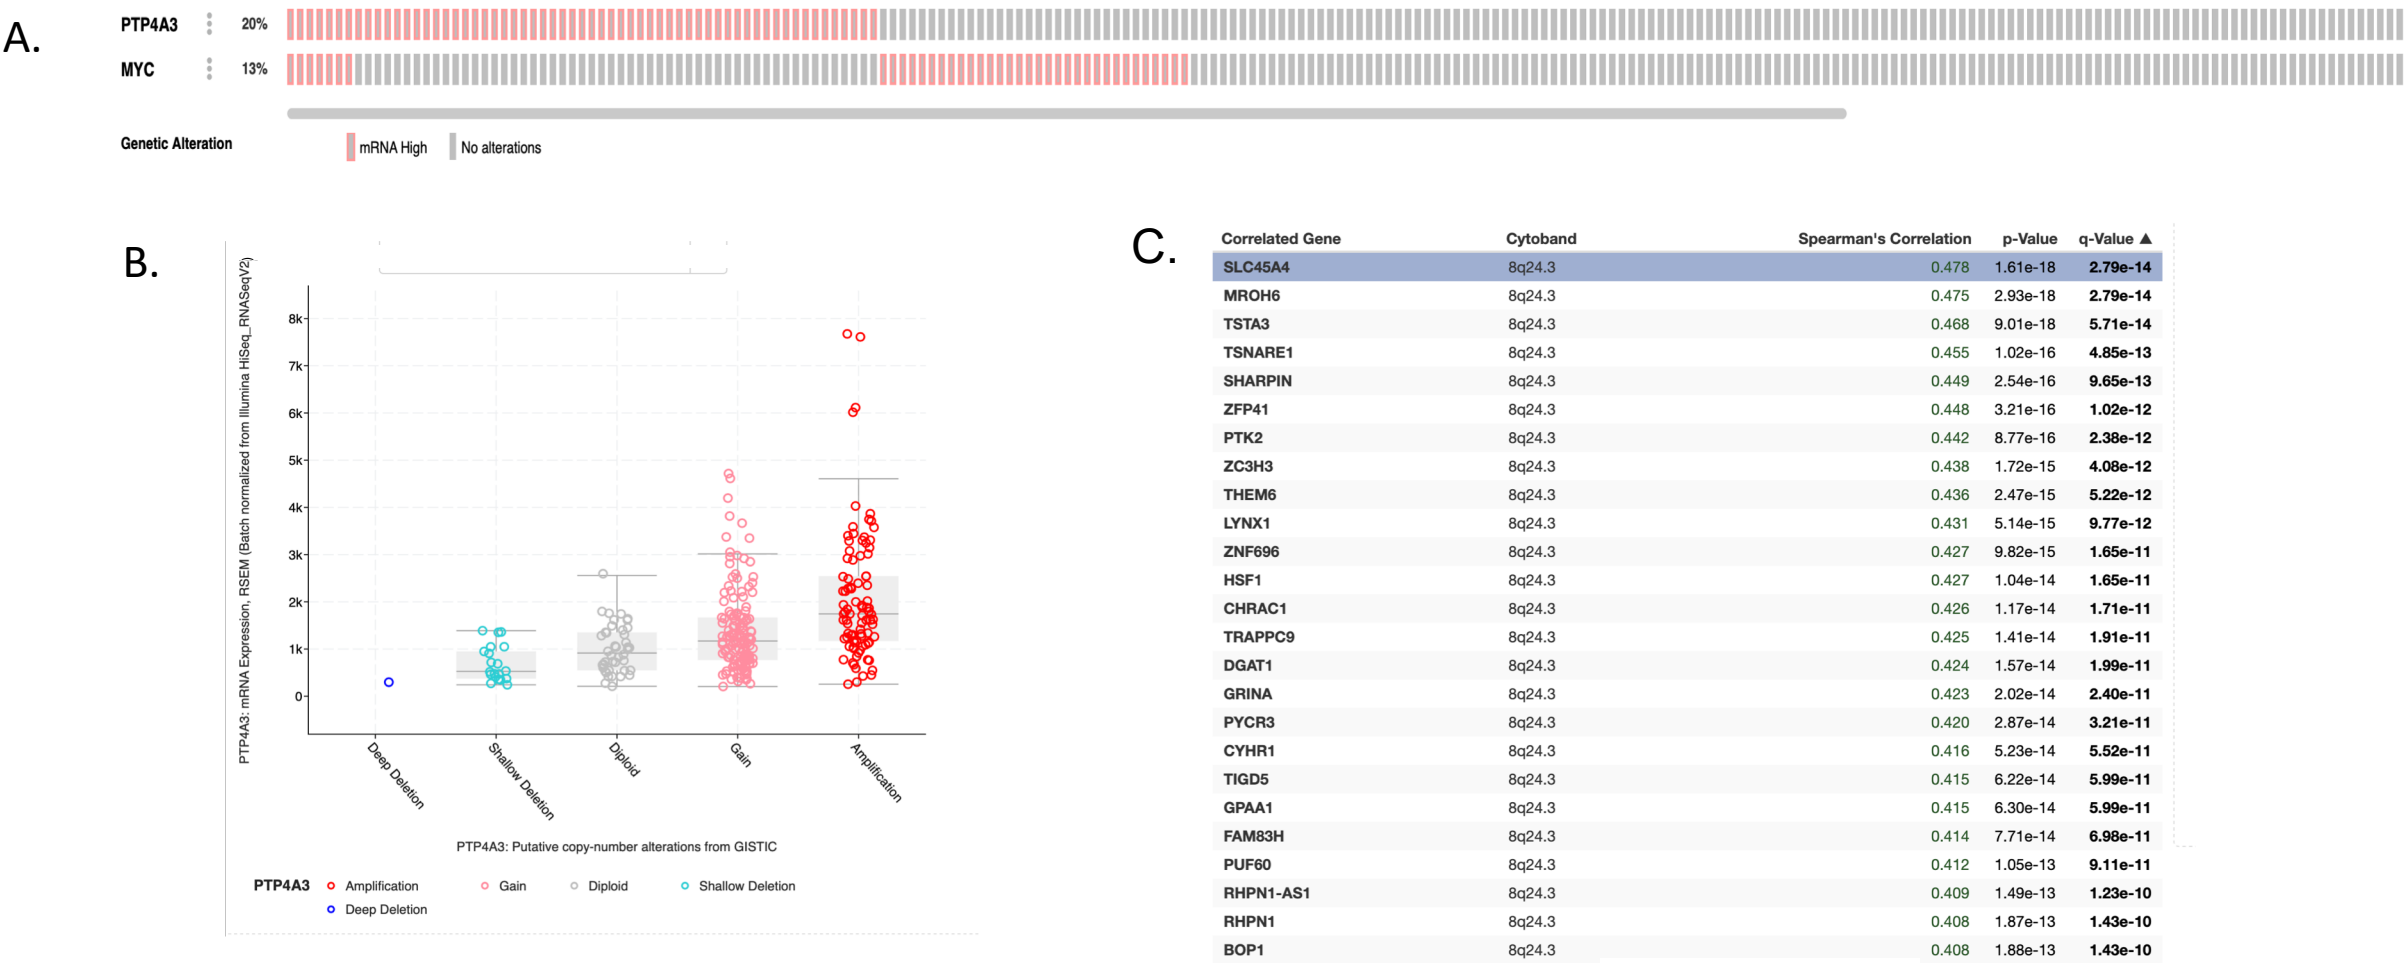

**Supplemental Figure S2. Gene amplification in TCGA data for HGSOV.** Panel A. Expression of PTP4A3 and c-Myc in HGSOV are not coordinately amplified. Panel B. Increase in PTP4A3 copy number in HGSOV from TCGA dataset. Panel C. Genes co-amplified with PTP4A3.

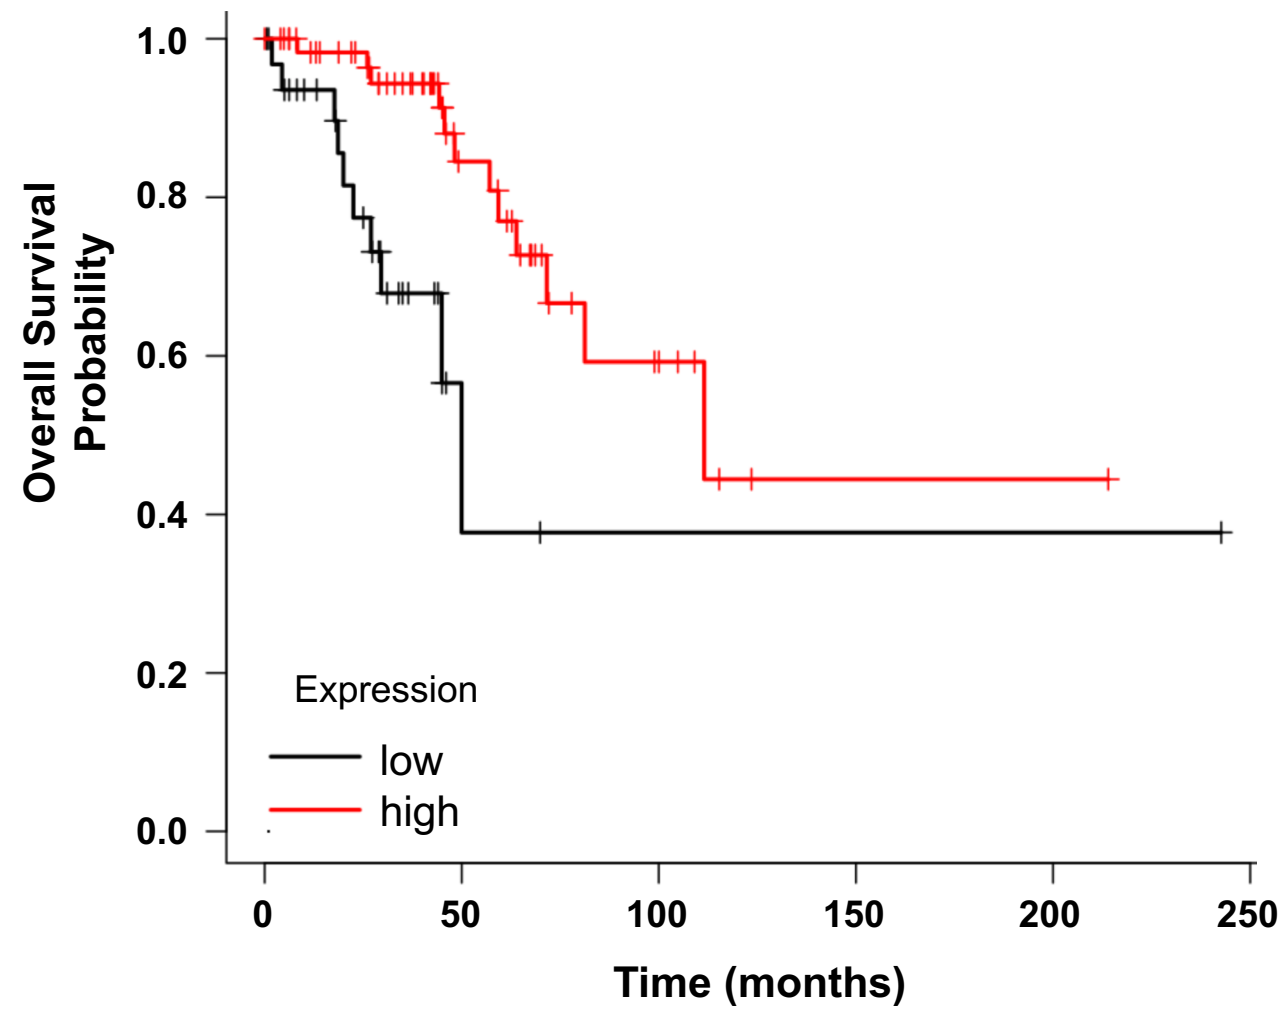

**Supplemental Figure S3.** High expression of MYC is associated with longer overall survival in patients with stages I/II HGSOC. Data from KMplot 202431\_s\_at. HR =0.28 (95% Confidence Intervals = 0.12-0.68) from 98 patients with low expressing cohort living 29.6 months and the high expressing cohort living 59.3 months.

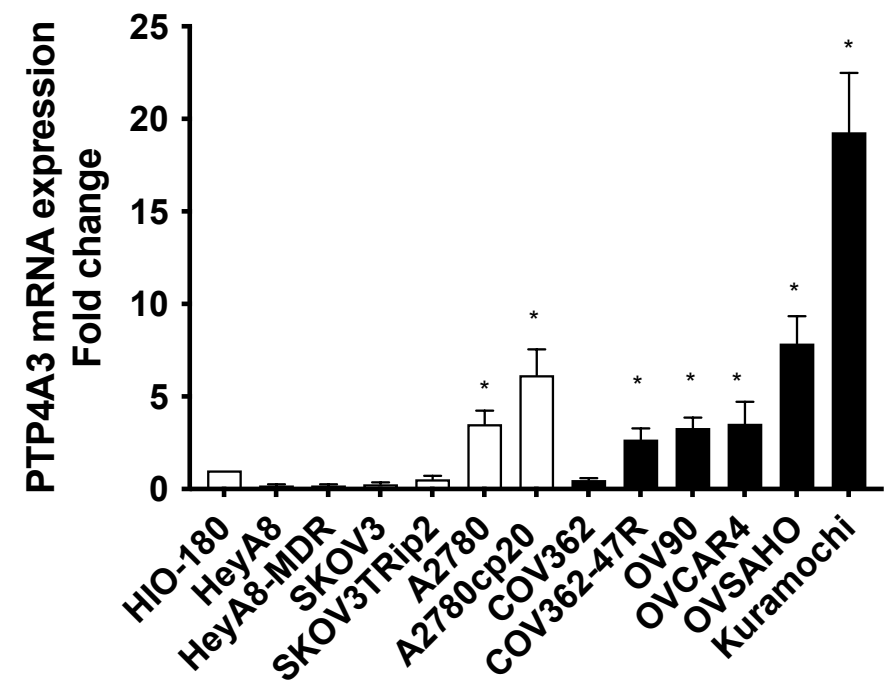

**Supplemental Figure S4.** PTP4A3 mRNA levels measured by qPCR and normalized to HPRT, actin and GAPDH were elevated in all HGSOC cells lines (black columns) compared to HIO-180 nonmalignant epithelial cells grown in culture with the exception of COV362 cells. \* =  $p < 0.05$  ANOVA.

## Appendix A.

Lazo et al. Credentialing and Pharmacologically Targeting PTP4A3 Phosphatase as a Molecular Target for Ovarian Cancer

### A. Chemical Synthesis

**1. General Considerations:** Unless stated otherwise, all reactions were performed under an atmosphere of N<sub>2</sub> gas that was passed through a column (10 x 2 cm) of Drierite®. Before use, THF was freshly distilled over sodium/benzophenone, and CH<sub>2</sub>Cl<sub>2</sub> was freshly distilled over CaH<sub>2</sub>. Et<sub>3</sub>N and *i*-Pr<sub>2</sub>NEt were distilled over CaH<sub>2</sub> and stored over KOH. All glassware and stir bars were dried in an oven for 3 h prior to use. Degassed solvents were obtained by sparging with N<sub>2</sub> for 1 h. Reaction progress was monitored by TLC analysis (pre-coated silica gel 60 F<sub>254</sub>) and spots were visualized by UV 254 nm and 395 nm). Purifications by chromatography were performed on SiO<sub>2</sub>. <sup>1</sup>H/<sup>13</sup>C NMR spectra were recorded on Bruker Avance 300/75 MHz, Bruker Avance 400/100 MHz or Bruker Avance 500/125 MHz instruments. High-resolution mass spectra were obtained on a Micromass UK Limited, Q-TOF Ultima API, or a Thermo Scientific Exactive Orbitrap LC-MS. Chemical shifts were reported in parts per million (ppm) with the residual solvent peak (CDCl<sub>3</sub>: 7.26 ppm for <sup>1</sup>H, 77.16 ppm for <sup>13</sup>C; DMSO-*d*<sub>6</sub>: 2.50 ppm for <sup>1</sup>H, 39.52 ppm for <sup>13</sup>C) used as the internal standard. Chemical shifts were tabulated as follows: chemical shift, multiplicity (s = singlet, d = doublet, t = triplet, q = quartet, dd = doublet of doublet, dt = doublet of triplet, ddd = doublet of doublet of doublet, m = multiplet, brs = broad singlet), coupling constant(s), and integration. IR spectra were obtained using neat samples on a Perkin-Elmer 100 ATR-IR spectrometer. Melting points were obtained using

a Mel-Temp instrument and are uncorrected. Photochemical transformations were performed as previously reported.<sup>1,2</sup>

### Synthesis of **EJR-912-41** and **EJR-912-43**

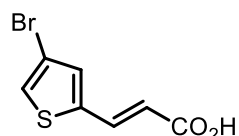

**(E)-3-(4-Bromothiophen-2-yl)acrylic acid (SI-1).** To a solution of thiophene-2-carbaldehyde (2.00 mL, 21.2 mmol) in CH<sub>2</sub>Cl<sub>2</sub> (80 mL), AlCl<sub>3</sub> (7.19 g, 52.9 mmol) was added. The reaction mixture darkened during the addition and was stirred for 10 min, charged with Br<sub>2</sub> (1.19 mL, 23.3 mmol), and stirred at room temperature for 12 h. The solution was quenched slowly at 0 °C with H<sub>2</sub>O and extracted with CH<sub>2</sub>Cl<sub>2</sub> (2 × 30 mL). The combined organic layers were washed with saturated aqueous Na<sub>2</sub>S<sub>2</sub>O<sub>3</sub> (30 mL) and saturated aqueous NaCl (30 mL), dried (MgSO<sub>4</sub>), filtered, and concentrated to give a dark oil. Purification by chromatography on SiO<sub>2</sub> (EtOAc:hexanes, 1:9) gave 4-bromothiophene-2-carboxaldehyde as a light yellow solid (3.43 g) that was used without further characterization.

---

<sup>1</sup> Tasker, N. R., Rastelli, E. J., Blanco, I. K., Burnett, J. C., Sharlow, E. R., Lazo, J. S., and Wipf, P. (2019) In-flow photooxygenation of aminothiopyridinones generates iminopyridinedione PTP4A3 phosphatase inhibitors. *Org Biomol Chem* 17, 2448-2466.

<sup>2</sup> Rastelli, E. J., Yue, D., Millard, C., and Wipf, P. (2021) 3D-Printed cartidge system for in-flow photooxygenation of 7-aminotheinopyridinones. *Tetrahedron* 79, 131875.

A solution of 4-bromothiophene-2-carboxaldehyde (3.43 g, 17.9 mmol) in pyridine (45 mL) was charged with malonic acid (5.66 g, 53.9 mmol) and piperidine (0.89 mL, 8.97 mmol), and heated to reflux. After 3 h, the mixture was concentrated under reduced pressure, diluted with water (100 mL), and a solid precipitated. The mixture was acidified with 6 M HCl until ~pH 2. The precipitate was filtered, washed with water (3 x 20 mL), redissolved in EtOAc (150 mL), dried (MgSO<sub>4</sub>), filtered, and concentrated to provide a crude residue as an off-white solid. The residue was recrystallized from toluene to provide **SI-1** (1.91 g, 39% over 2 steps) as a white solid: <sup>1</sup>H NMR (300 MHz, DMSO-*d*<sub>6</sub>): δ 12.53 (brs, 1 H), 7.81 (d, *J* = 1.2 Hz, 1 H), 7.66 (d, *J* = 15.9 Hz, 1 H), 7.57 (d, *J* = 1.5 Hz, 1 H), 6.26 (d, *J* = 15.9 Hz, 1 H). Spectral data are consistent with literature properties.<sup>3</sup>

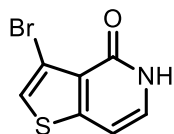

**3-Bromothieno[3,2-*c*]pyridin-4(5*H*)-one (SI-2).** Triethylamine (1.2 mL, 8.58 mmol) was added to a solution of (*E*)-3-(4-bromothiophen-2-yl)acrylic acid (1.00 g, 4.29 mmol) in acetone (8 mL) at 0 °C. Ethyl chloroformate (1.25 mL, 12.9 mmol) was added, and the reaction mixture was stirred at 0 °C for 30 min before it was slowly charged with a solution of NaN<sub>3</sub> (0.422 g, 6.43 mmol) in H<sub>2</sub>O (3.5 mL). The mixture was stirred for 15 min, poured into ice-chilled H<sub>2</sub>O, extracted with EtOAc (3 x 40 mL), dried (MgSO<sub>4</sub>), and concentrated to provide a tan solid that was used without further purification.

<sup>3</sup> Kallepalli, V. A.; Shi, F.; Paul, S.; Onyeozili, E. N.; Maleczka, R. E., Smith III, M. R. *J. Org. Chem.* **2009**, *74*, 3849–3855.

A 3-neck flask fitted with a stopper, addition funnel, and condenser was charged with  $\text{Bu}_3\text{N}$  (1.3 mL, 5.55 mmol),  $\text{Ph}_2\text{O}$  (4.5 mL), and subsequently heated to 240 °C. The addition funnel was charged with a solution of crude acyl azide (1.10 g, 4.26 mmol) in  $\text{CH}_2\text{Cl}_2$  (12 mL) and added to the reaction mixture over 30 min. This mixture was subsequently stirred at 240 °C for 5 min, cooled to room temperature, and treated with hexanes (5 mL). An orange suspension formed after stirring for 10 min. The precipitate was allowed to settle, hexanes were decanted, and the yellow solid residue was triturated with EtOAc, filtered, and washed with hexanes (3 x 15 mL) to provide **SI-2** (0.449 g, 46% over 2 steps) as a tan solid: Mp >250 °C; IR (ATR):  $\nu_{\text{max}}$  3102, 3080, 2988, 2940, 2891, 1639, 1598, 1455, 1222, 975, 805, 794, 754, 728  $\text{cm}^{-1}$ ;  $^1\text{H}$  NMR (300 MHz,  $\text{DMSO}-d_6$ ):  $\delta$  11.47 (brs, 1 H), 7.69 (s, 1 H), 7.29-7.27 (m, 1 H), 6.86 (d,  $J$  = 7.2 Hz, 1 H);  $^{13}\text{C}$  NMR (125 MHz,  $\text{DMSO}-d_6$ ):  $\delta$  157.9, 149.2, 130.8, 124.9, 122.8, 106.9, 101.0; HRMS (ESI<sup>+</sup>)  $m/z$ :  $[\text{M}+\text{H}]^+$  calcd for  $\text{C}_7\text{H}_5\text{ONSBr}$  229.9270; Found, 229.9182.

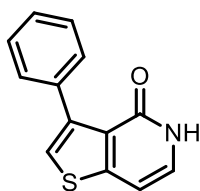

**3-Phenylthieno[3,2-*c*]pyridin-4(5*H*)-one (SI-3).** In a  $\text{N}_2$ -filled glove box, a 100-mL flask was charged with  $\text{Pd}(\text{PPh}_3)_4$  (0.200 g, 0.173 mmol) and phenylboronic acid (0.517 g, 4.15 mmol). The flask was removed from the glovebox and sequentially charged with 3-bromothieno[3,2-*c*]pyridin-4(5*H*)-one (0.797 g, 3.46 mmol) and  $\text{Na}_2\text{CO}_3$  (0.844 g, 7.96 mmol), flushed with  $\text{N}_2$ , diluted with deoxygenated dioxane/ $\text{H}_2\text{O}$  (2:1, 35 mL), fitted with



a reflux condenser, and heated to 90 °C for 13 h. The resulting orange mixture was cooled to room temperature, diluted with water (150 mL), cooled in an ice-bath, and filtered. The light brown residue was washed with H<sub>2</sub>O (2 x 100 mL), dissolved in CH<sub>2</sub>Cl<sub>2</sub>, dried (MgSO<sub>4</sub>), and concentrated to give a brown solid that was suspended in CH<sub>2</sub>Cl<sub>2</sub> (3 mL). The suspension was filtered to give **SI-3** as a light-yellow solid. The filtrate was concentrated and purified by chromatography on SiO<sub>2</sub> (EtOAc:CH<sub>2</sub>Cl<sub>2</sub>, 2:3) to provide an additional batch of light-yellow solid **SI-3** (combined amount: 0.640 g, 81%): Mp 187-188 °C; IR (ATR):  $\nu_{\text{max}}$  2820, 1648, 1610, 1234, 975, 942, 891, 840, 744, 696 cm<sup>-1</sup>; <sup>1</sup>H NMR (300 MHz, DMSO-*d*<sub>6</sub>):  $\delta$  11.30 (brs, 1 H), 7.50-7.46 (m, 3 H), 7.39-7.31 (m, 3 H), 7.26 (t, *J* = 6.0 Hz, 1 H), 6.87 (d, *J* = 6.9 Hz, 1H); <sup>13</sup>C NMR (100 MHz, DMSO-*d*<sub>6</sub>)  $\delta$  158.7, 150.2, 141.1, 135.9, 129.8, 129.6, 127.2, 126.9, 126.0, 123.0, 101.1; HRMS (ESI<sup>+</sup>) *m/z*: [M+H]<sup>+</sup> calcd for C<sub>13</sub>H<sub>10</sub>ONS 228.0478; Found 228.0389.

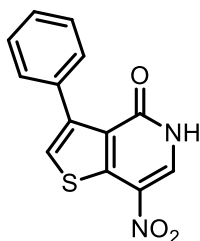

**7-Nitro-3-phenylthieno[3,2-*c*]pyridin-4(5*H*)-one (SI-4).** A heterogeneous mixture of 3-phenylthieno[3,2-*c*]pyridin-4(5*H*)-one (0.347 g, 1.52 mmol) in MeCN (38 mL) was sparged with O<sub>2</sub> at room temperature for 15 min. Subsequently, *t*-BuONO (0.81 mL, 6.11 mmol) was added and the mixture was stirred under an O<sub>2</sub> atmosphere (1 atm, balloon) for 14 h, concentrated to ~¼ volume, filtered, and the residue was washed with cold MeCN to provide a yellow solid. Purification by flash chromatography on SiO<sub>2</sub> (EtOAc:CH<sub>2</sub>Cl<sub>2</sub>, 2:3) gave **SI-4** (0.207 g, 50%) as a yellow solid: Mp >250 °C; IR (ATR):  $\nu_{\text{max}}$  2676, 1649, 1610,

1493, 1341, 1233, 1111, 1021, 995, 764, 745, 696  $\text{cm}^{-1}$ ;  $^1\text{H}$  NMR (300 MHz,  $\text{DMSO}-d_6$ ):  $\delta$  12.61 (brs, 1 H), 8.74 (s, 1 H), 7.71 (s, 1 H), 7.47-7.35 (m, 5 H);  $^{13}\text{C}$  NMR (75 MHz,  $\text{DMSO}-d_6$ ):  $\delta$  158.0, 141.2, 141.1, 135.6, 134.9, 129.5, 127.4, 127.3, 127.2, 126.9, 124.6; HRMS (ESI<sup>+</sup>)  $m/z$ :  $[\text{M}+\text{H}]^+$  calcd for  $\text{C}_{13}\text{H}_9\text{O}_3\text{N}_2\text{S}$  273.0328; Found 273.0226.

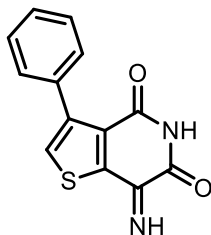

**7-Imino-3-phenylthieno[3,2-*c*]pyridine-4,6(5*H*,7*H*)-dione (EJR-912-41).** A suspension of 7-nitro-3-phenylthieno[3,2-*c*]pyridin-4(5*H*)-one (**SI-4**, 0.233 g, 0.856 mmol) in dioxane:MeOH (2:1, 20 mL) was treated under an  $\text{N}_2$  atmosphere with 10% Pd/C (0.136 g, 0.128 mmol).  $\text{H}_2$  was bubbled through the mixture for 10 min, and the reaction mixture was stirred at room temperature under  $\text{H}_2$  atmosphere (1 atm, balloon) for 12 h, filtered through Celite, and washed with dioxane/MeOH (1:2, 10 mL portions) until colored bands stopped eluting. The filtrate was concentrated to give a dark solid that was used without further purification in the photo-oxygenation reaction.

A solution of the crude solid in MeOH (850 mL) was passed through the flow apparatus at a rate of  $1.9 \text{ mL min}^{-1}$  (setting of 5 on the VWR Variable Peristaltic Pump-Model PP3300, corresponding to a 42.0 min residence time) under white LED (40 W) irradiation. The flow apparatus was flushed with MeOH (20 mL). The crude mixture was adsorbed onto Celite and purified by chromatography on  $\text{SiO}_2$  ( $\text{CH}_2\text{Cl}_2$ :MeCN, 1:4) to yield the imine/trione mixture as a yellow-orange solid.

The imine/trione mixture was suspended in MeOH (0.009 M) and treated with  $\text{NH}_4\text{OAc}$  (30 eq.) in a sealed pressure tube. The reaction mixture was heated to 60 °C for 18 h before cooling to room temperature and diluting with EtOAc (100 mL). The solution was washed sequentially with saturated aqueous  $\text{NaHCO}_3$ ,  $\text{H}_2\text{O}$ , and saturated aqueous  $\text{NaCl}$ . The combined aqueous washes were extracted with EtOAc (3 x 40 mL or until the aqueous phase was colorless). The combined organic extracts were dried ( $\text{Na}_2\text{SO}_4$ ), filtered, and adsorbed onto Celite. Purification by chromatography on  $\text{SiO}_2$  (MeCN: $\text{CH}_2\text{Cl}_2$ , 1:4) provided **EJR-912-41** (0.097 g, 44% over 3 steps) as an orange solid: Mp >250 °C; IR (ATR):  $\nu_{\text{max}}$  3226, 1702, 1611, 1436, 1255, 1212, 1171, 1121, 950, 906, 756, 692  $\text{cm}^{-1}$ ;  $^1\text{H}$  NMR (500 MHz,  $\text{DMSO}-d_6$ ):  $\delta$  11.69 (s, 1 H), 11.63 (s, 1 H), 7.88 (s, 1 H), 7.47-7.45 (m, 2 H), 7.42-7.38 (m, 3 H);  $^{13}\text{C}$  NMR (75 MHz,  $\text{DMSO}-d_6$ ):  $\delta$  159.7, 157.4, 154.2, 145.6, 143.1, 134.5, 131.4, 131.1, 129.3, 127.8, 127.7; HRMS (ESI $^-$ )  $m/z$ :  $[\text{M}-\text{H}]^-$  calcd for  $\text{C}_{13}\text{H}_7\text{O}_2\text{N}_2\text{S}$  255.0223; Found 255.0230.

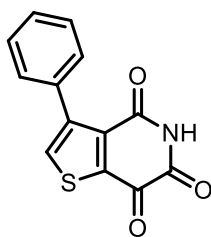

**3-Phenylthieno[3,2-c]pyridine-4,6,7(5H)-trione (EJR-912-43).** To a solution of 7-imino-3-phenylthieno[3,2-c]pyridine-4,6(5H,7H)-dione (**EJR-912-41**, 0.052 g, 0.203 mmol) in THF/ $\text{H}_2\text{O}$  (5:1, 5 mL), was added  $\text{H}_2\text{SO}_4$  (3 drops). The reaction mixture was stirred for 22 h, diluted with EtOAc (50 mL) and washed with saturated aqueous  $\text{NaHCO}_3$  (3 x 15 mL) and saturated aqueous  $\text{NaCl}$  (15 mL). The organic layer was dried ( $\text{MgSO}_4$ ), filtered, and concentrated to give **EJR-912-43** (0.047 g, 90%) as an orange solid: Mp 256-258 °C;

IR (ATR):  $\nu_{\max}$  3194, 3097, 1709, 1678, 1436, 1387, 1265, 910, 881, 12, 760, 740, 701, 694, 678  $\text{cm}^{-1}$ ;  $^1\text{H}$  NMR (300 MHz,  $\text{DMSO}-d_6$ ):  $\delta$  11.75 (brs, 1 H), 8.20 (s, 1 H), 7.48-7.40 (m, 5 H);  $^{13}\text{C}$  NMR (125 MHz,  $\text{DMSO}-d_6$ ):  $\delta$  169.9, 159.3, 157.6, 143.9, 143.8, 136.3, 135.1, 133.9, 129.3, 128.1, 127.8; HRMS (ESI $^-$ )  $m/z$ :  $[\text{M}-\text{H}]^-$  calcd  $\text{C}_{13}\text{H}_6\text{O}_3\text{NS}$  256.0063; Found 256.0071.

### Synthesis of **EJR-912-57** and **EJR-912-50**

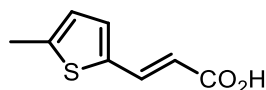

**(E)-3-(5-methylthiophen-2-yl)acrylic acid (SI-5).** A solution of 5-methyl-2-thiophenecarboxaldehyde (4.00 g, 31.1 mmol) in pyridine (77 mL) was treated with malonic acid (9.76 g, 93.2 mmol) and piperidine (1.55 mL, 15.5 mmol) and heated to reflux. After 3 h, the reaction mixture was concentrated under reduced pressure and diluted with water (100 mL) whereupon a solid precipitated. The mixture was acidified with 6 M HCl until ~pH 2. The precipitate was filtered and washed with water (3 x 20 mL). The filter cake was dissolved in EtOAc (150 mL), dried ( $\text{MgSO}_4$ ), filtered, and concentrated to provide an off-white solid. The crude material was recrystallized from toluene to provide **SI-5** (3.21 g, 61%) as a white solid:  $^1\text{H}$  NMR (300 MHz,  $\text{CDCl}_3$ ):  $\delta$  7.79

(d,  $J = 15.6$  Hz, 1 H), 7.09 (d,  $J = 3.6$  Hz, 1 H), 6.73 (dd,  $J = 3.6$  Hz, 0.9 Hz, 1 H), 6.09 (d,  $J = 15.6$  Hz, 1 H), 2.51 (s, 3 H). Spectral data are consistent with literature values.<sup>4</sup>

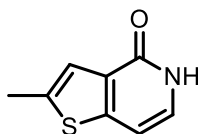

**2-Methylthieno[3,2-*c*]pyridin-4(5*H*)-one (SI-6).** Triethylamine (5.36 mL, 38.2 mmol) was added to a solution of (*E*)-3-(5-methylthiophen-2-yl)acrylic acid (**SI-5**, 3.21 g, 19.1 mmol) in acetone (36 mL) at 0 °C (ice-bath). Subsequently, ethyl chloroformate (5.58 mL, 57.3 mmol) was added, and the mixture was stirred at 0 °C for 1.5 h. A solution of NaN<sub>3</sub> (1.88 g, 28.6 mmol) in H<sub>2</sub>O (14 mL) was slowly added to the reaction mixture at 0 °C. The mixture became homogeneous and then a solid began to precipitate. Stirring continued for 15 min. The reaction mixture was poured into ice-chilled H<sub>2</sub>O (30 mL) and extracted with EtOAc (3 x 30 mL). The combined organic layers were dried (MgSO<sub>4</sub>), filtered and concentrated to give crude acyl azide as a tan solid that was used for the next step without further purification.

A 3-neck flask fitted with a stopper, addition funnel, and condenser was charged with Bu<sub>3</sub>N (5.89 mL, 24.8 mmol) and Ph<sub>2</sub>O (19 mL), and was subsequently heated to 240 °C. The addition funnel was charged with a solution of the crude acyl azide (3.68 g, 19.0 mmol) in CH<sub>2</sub>Cl<sub>2</sub> (30 mL). The acyl azide solution was added slowly to the hot reaction mixture over ca. 40 min. to allow the CH<sub>2</sub>Cl<sub>2</sub> to boil off. The mixture was stirred at 240 °C

---

<sup>4</sup> Yang, B.; Vasbinder, M. M.; Hird, A. W.; Su, Q.; Wang, H.; Yu, Y.; Toader, D.; Lyne, P. D.; Read, J. A.; Breed, J.; Ioannidis, S.; Deng, C.; Grondine, M.; DeGrace, N.; Whitston, D.; Brassil, P.; Janetka, W. W. *J. Med. Chem.* **2018**, 61, 1061-1073. *J. Org. Chem.* **2009**, 74, 3849–3855

for an additional 15 min. Upon cooling to room temperature, hexanes (20 mL) were added, and a solid began to precipitate. The hexanes layer was decanted, and the remaining residue was suspended in EtOAc (15 mL). The solid precipitate was filtered to provide **SI-6** (2.78 g, 88% over 2 steps) as a tan solid: Mp 214-215 °C; IR (ATR):  $\nu_{\text{max}}$  2818, 1648, 1604, 1275, 1225, 1124, 1076, 960, 765  $\text{cm}^{-1}$ ;  $^1\text{H}$  NMR (300 MHz,  $\text{DMSO}-d_6$ ):  $\delta$  11.30 (brs, 1 H), 7.17-7.15 (m, 2 H), 6.73 (d,  $J$  = 6.9 Hz, 1 H), 2.50 (s, 3 H, overlapping the DMSO signal);  $^{13}\text{C}$  NMR (125 MHz,  $\text{DMSO}-d_6$ ):  $\delta$  158.3, 147.3, 138.4, 130.7, 128.8, 121.8, 100.8, 15.1; HRMS (ESI<sup>+</sup>)  $m/z$ :  $[\text{M}+\text{H}]^+$  calcd for  $\text{C}_8\text{H}_8\text{NOS}$  166.0321; Found 166.0313.

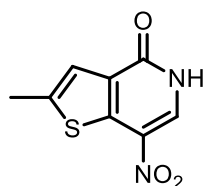

**2-Methyl-7-nitrothieno[3,2-c]pyridin-4(5H)-one (SI-7).** A solution of 2-methylthieno[3,2-c]pyridin-4(5H)-one (**SI-6**, 2.25 g, 13.6 mmol) in MeCN (340 mL) at room temperature was fitted with an  $\text{O}_2$  balloon (1 atm), and  $\text{O}_2$  was bubbled through the solvent for 15 min. Subsequently,  $t\text{-BuONO}$  (7.19 mL, 54.5 mmol) was added, and the mixture was stirred under an  $\text{O}_2$  atmosphere (1 atm, balloon) at 60 °C for 3 h, concentrated to  $\sim \frac{1}{4}$  volume, and the resulting suspension was placed in a -20 °C freezer for 2 h before filtering and washing with cold MeCN to provide **SI-7** (1.90 g, 66%) as a yellow solid: Mp >250 °C; IR (ATR):  $\nu_{\text{max}}$  2832, 1649, 1613, 1496, 1339, 1248, 1231, 1118, 1040, 897, 840, 825, 767, 707  $\text{cm}^{-1}$ ;  $^1\text{H}$  NMR (500 MHz,  $\text{DMSO}-d_6$ ):  $\delta$  12.9 (brs, 1 H), 8.63 (s, 1 H), 7.27 (d,  $J$  = 1.0 Hz, 1 H), 2.54 (d,  $J$  = 1.0 Hz, 3 H);  $^{13}\text{C}$  NMR (75 MHz,  $\text{DMSO}-d_6$ ):  $\delta$  157.7,

142.4, 137.9, 134.4, 129.1, 127.3, 121.9, 14.7; HRMS (ESI<sup>+</sup>) *m/z*: [M+H]<sup>+</sup> calcd for C<sub>8</sub>H<sub>7</sub>O<sub>3</sub>N<sub>2</sub>S 211.0171; Found 211.0161.

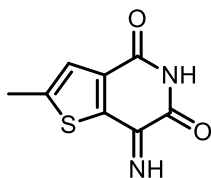

**7-Imino-2-methylthieno[3,2-*c*]pyridine-4,6(5*H*,7*H*)-dione (EJR-912-57).** A suspension of 2-methyl-7-nitrothieno[3,2-*c*]pyridin-4(5*H*)-one (**SI-7**, 0.250 g, 1.19 mmol) in dioxane:MeOH (2:1, 30 mL) was treated under an N<sub>2</sub> atmosphere with 10% Pd/C (0.190 g, 0.178 mmol). H<sub>2</sub> was bubbled through the mixture for 10 min. The suspension was stirred at rt under H<sub>2</sub> (1 atm, balloon) for 12 h, filtered through Celite, and washed with dioxane:MeOH (1:2, 10 mL portions) until colored bands stopped eluting. The filtrate was concentrated to give a dark solid that was used without further purification in the photo-oxygenation reaction.

A solution of the crude solid in MeOH (800 mL) was passed through the flow apparatus at a rate of 1.9 mL min<sup>-1</sup> (setting of 5 on the VWR Variable Peristaltic Pump-Model PP3300, corresponding to a 42.0 min residence time) under white LED (40 W) irradiation. The tubing was flushed with MeOH (20 mL). The mixture was adsorbed onto Celite and purified by chromatography on SiO<sub>2</sub> (CH<sub>2</sub>Cl<sub>2</sub>:MeCN) to yield the a mixture of imine/trione as a yellow-orange solid.

The imine/trione mixture was suspended in MeOH (0.009 M) and treated with NH<sub>4</sub>OAc (30 eq.) in a sealed pressure tube. The reaction mixture was heated to 60 °C for 18 h before cooling to room temperature and diluting with EtOAc (100 mL). The solution was

washed sequentially with saturated aqueous NaHCO<sub>3</sub>, H<sub>2</sub>O, and saturated aqueous NaCl. The combined aqueous washes were extracted with EtOAc (3 x 40 mL or until the aqueous phase was colorless). The combined organic extracts were dried (Na<sub>2</sub>SO<sub>4</sub>), filtered, and concentrated to give **SI-7** (0.101 g, 44% over 3 steps) as a brown solid: Mp > 250 °C; IR (ATR):  $\nu_{\text{max}}$  3010, 2829, 1707, 1685, 1617, 1474, 1425, 1382, 1307, 1244, 1169, 914, 867, 774 cm<sup>-1</sup>; <sup>1</sup>H NMR (300 MHz, DMSO-*d*<sub>6</sub>):  $\delta$  11.46-11.41 (brs, 2 H), 7.29 (d, *J* = 1.2 Hz, 1 H), 2.56 (d, *J* = 1.2 Hz, 3 H); <sup>13</sup>C NMR (125 MHz, DMSO-*d*<sub>6</sub>):  $\delta$  160.0, 157.9, 153.2, 147.5, 141.4, 135.8, 124.5, 15.5; HRMS (ESI<sup>+</sup>) *m/z*: [M+H]<sup>+</sup> calcd for C<sub>8</sub>H<sub>7</sub>O<sub>2</sub>N<sub>2</sub>S 195.0223; Found 195.0223.

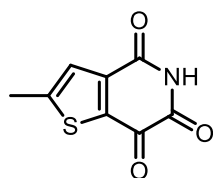

**2-Methylthieno[3,2-*c*]pyridine-4,6,7(5*H*)-trione (EJR-912-50).** A solution of 7-imino-2-methylthieno[3,2-*c*]pyridine-4,6(5*H*,7*H*)-dione (**EJR-912-57**, 0.045 g, 0.231 mmol) in THF:H<sub>2</sub>O (5:1, 6 mL) was treated with H<sub>2</sub>SO<sub>4</sub> (3 drops), stirred for 16 h, diluted with EtOAc (50 mL) and washed with saturated aqueous NaHCO<sub>3</sub> (3 x 15 mL) and saturated aqueous NaCl (15 mL). The organic layer was dried (MgSO<sub>4</sub>), filtered, and concentrated to provide **EJR-912-50** (0.020 g, 44%) as an orange solid: Mp > 191 °C (dec); IR (ATR):  $\nu_{\text{max}}$  3073, 2925, 2856, 1730, 1667, 1456, 1438, 1419, 1291, 1225, 1184, 879, 829 cm<sup>-1</sup>; <sup>1</sup>H NMR (300 MHz, DMSO-*d*<sub>6</sub>):  $\delta$  11.80 (brs, 1 H), 7.40 (d, *J* = 1.0 Hz, 1 H), 2.62 (d, *J* = 1.0 Hz, 3 H); <sup>13</sup>C NMR (125 MHz, DMSO-*d*<sub>6</sub>):  $\delta$  168.5, 159.6, 158.1, 153.7, 140.3, 139.6, 125.9, 15.9; HRMS (ESI<sup>+</sup>) *m/z*: [M+H]<sup>+</sup> calcd for C<sub>8</sub>H<sub>6</sub>O<sub>3</sub>NS 196.0063; Found 196.0062.



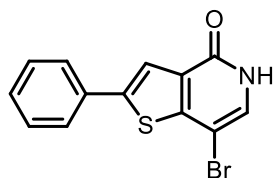

**7-Bromo-2-phenylthieno[3,2-*c*]pyridin-4(5*H*)-one (NRT-902-38).** A solution of 2-phenylthieno[3,2-*c*]pyridin-4(5*H*)-one<sup>1</sup> (0.500 g, 2.20 mmol) in AcOH (6.3 mL) was treated at room temperature with Br<sub>2</sub> (0.136 mL, 2.64 mmol), heated at reflux for 30 min, cooled to room temperature, and treated with H<sub>2</sub>O (6 mL). A precipitate formed that was filtered, washed with H<sub>2</sub>O (2 x 5 mL), and dried to give **NRT-902-38** (0.547 g, 81%) as a brown solid: Mp 249-251 °C; IR (ATR):  $\nu_{\text{max}}$  3049, 2776, 1651, 1596, 1532, 1499, 1482, 1445, 1362, 1331, 1273, 1235, 1206, 1182, 1142, 1093, 1069, 1030, 984, 838, 748, 707, 681 cm<sup>-1</sup>; <sup>1</sup>H NMR (400 MHz, DMSO-*d*<sub>6</sub>):  $\delta$  11.81 (brs, 1 H), 8.01 (s, 1 H), 7.81 (d, *J* = 1.2 Hz, 2 H), 7.59 (s, 1 H), 7.47 (t, *J* = 8.0 Hz, 2 H), 7.38 (td, *J* = 5.6, 8.4 Hz, 1 H); <sup>13</sup>C NMR (100 MHz, DMSO-*d*<sub>6</sub>) :  $\delta$  157.6, 148.5, 142.2, 132.5, 131.2, 130.5, 129.3, 128.7, 125.8, 121.2, 91.5; HRMS (ESI<sup>+</sup>) *m/z*: [M+H]<sup>+</sup> calcd for C<sub>13</sub>H<sub>9</sub>BrNOS 307.9555; Found 307.9556.
